# Supplementary material for: Study on the Characteristics of Traditional Chinese Medicine Syndromes in Patients with Erosive Gastritis Based on Metabolomics
Source: Hindawi journal article supplement (doi:10.1155/2024/6684677), 2024-01-02
Supplement: f1 [file 6684677.f1.pdf]

|        |     |       |                      |
|--------|-----|-------|----------------------|
| Gender | DHS | LDQSS | Volunteers (Control) |
| male   |     | 15    | 15                   |
| female |     | 17    | 17                   |

|                |       |        |        |
|----------------|-------|--------|--------|
| Groups         |       |        |        |
| DHS vs Control | Group | Gender | Number |
|                |       | 1      | 1      |
|                |       | 1      | 2      |
|                |       | 2      | 1      |
|                |       | 2      | 2      |

$\chi^2$  P value  
0.061 0.806

|                  |       |        |        |
|------------------|-------|--------|--------|
| Groups           |       |        |        |
| LDQSS vs Control | Group | Gender | Number |
|                  |       | 1      | 1      |
|                  |       | 1      | 2      |
|                  |       | 2      | 1      |
|                  |       | 2      | 2      |

$\chi^2$  P value  
0.061 0.806

|                    | DHS            | LDQSS | Volunteers (Control) |
|--------------------|----------------|-------|----------------------|
| 1                  | 47             | 52    | 42                   |
| 2                  | 51             | 52    | 47                   |
| 3                  | 56             | 59    | 50                   |
| 4                  | 28             | 69    | 50                   |
| 5                  | 60             | 48    | 49                   |
| 6                  | 50             | 65    | 30                   |
| 7                  | 57             | 54    | 51                   |
| 8                  | 46             | 51    | 60                   |
| 9                  | 53             | 54    | 53                   |
| 10                 | 29             | 52    | 48                   |
| 11                 | 48             | 38    | 50                   |
| 12                 | 46             | 52    | 32                   |
| 13                 | 58             | 39    | 46                   |
| 14                 | 52             | 45    | 44                   |
| 15                 | 24             | 53    | 49                   |
| 16                 | 41             | 35    | 52                   |
| 17                 | 45             | 62    | 57                   |
| 18                 | 44             | 54    | 50                   |
| 19                 | 61             | 39    | 57                   |
| 20                 | 56             | 56    | 36                   |
| 21                 | 60             | 52    | 68                   |
| 22                 | 58             | 44    | 57                   |
| 23                 | 59             | 43    | 58                   |
| 24                 | 62             | 63    | 56                   |
| 25                 | 56             | 56    | 62                   |
| 26                 | 39             | 46    | 40                   |
| 27                 | 40             | 37    | 62                   |
| 28                 | 49             | 25    | 49                   |
| 29                 | 52             | 41    | 56                   |
| 30                 | 59             | 55    | 43                   |
| 31                 | 54             | 46    |                      |
| 32                 | 48             | 57    |                      |
| Mean               | 49.63          | 49.81 | 50.13                |
| Standard Deviation | 9.764          | 9.563 | 8.729                |
| Groups             | <i>P</i> value |       |                      |
| DHS vs Control     | 0.155          |       |                      |
| LDQSS vs Control   | 0.432          |       |                      |
